# Supplementary material
Source: HighWire-hosted journal article supplement (https://www.cfp.ca/highwire/filestream/34408/field_highwire_adjunct_files/0/331_Questions_About_Screening_Tests.pdf)
Supplement: 331_Questions_About_Screening_Tests.pdf [file 331_Questions_About_Screening_Tests.pdf]

## **CFPlus.** Questions to ask practitioners performing screening tests

### Hypertension Screening (Check with practice staff)

Was the blood pressure taken with an automated machine?

Was the patient allowed to settle down before taking the pressure?

Did you check with the patient and ensure they were relaxed, comfortable with arm supported?

Was the patient talking or silent while the measurement was taken?

### Laboratory Tests

Is the laboratory accredited? By whom, and when was the last time that happened?

How well did you perform on the accreditation?

What are the quality control measures you use routinely?

How much measurement variation is there?

### Cervical Cancer Screening

Is the cytology lab accredited?

What quality assurance processes do you have?

Do you have a way to check the rates of abnormal results?

Is there a mechanism to perform cytology/histology correlations?

Do you give feedback to test takers if we are not providing good samples?

Do you give feedback to colposcopists on the quality and appropriateness of their biopsies?

### Mammography

Does your practice/unit routinely generate statistics on quality? Can you tell me about them?

How do you correlate mammographic and biopsy findings? Are there regular clinical/pathology correlation conferences?

What is your "call rate" for abnormal results, for women at different ages?

What proportion of positive results go on to biopsy?

What is your proportion of biopsies that show malignancy?

### Colonoscopy

Does your colonoscopy unit have a system of measuring quality of process and outcomes?

Do members get feedback about quality? What are your quality statistics?

What proportion of your (or your unit's) colonoscopies have an adequate bowel preparation?

What is your colonoscopy completion to cecum rate, average withdrawal time, adenoma detection rate, polyp detection rate?

What is your (or your unit's) perforation rate?

What is your (or your unit's) post-colonoscopy bleeding rate?  
What is the rate of interval cancers in your colonoscopy unit?

#### Prostate Screening Follow-up

When do you recommend PSA simply be repeated?

What is the threshold of PSA for evaluation with imaging and biopsy?

What is the complication rate for prostate biopsies?

Is the pathologist a prostate pathology expert? What quality processes does she or he use?

Do you participate in regular clinical/pathology correlation conferences?
